# Supplementary material
Source: PubMed Central journal article supplement (PMC5234718)
Supplement: 10.1194_M071381_jlr.M071381-1.pdf [file 10.1194_M071381_jlr.M071381-1.pdf]

**Supplemental Table S1.** Sequences for RT-qPCR primer-pairs used for human mRNAs.

| <b>Gene</b>  | <b>Primer</b> | <b>Sequence</b>              |
|--------------|---------------|------------------------------|
| <i>HPRT</i>  | Forward       | 5'-AGTTGAGAGATCATCTCCAC-3'   |
|              | Reverse       | 5'-TTGCTGACCTGCTGGATTTAC-3'  |
| <i>FNI</i>   | Forward       | 5'-AGCAGACCCAGCTTAGAGTT-3'   |
|              | Reverse       | 5'-GCAGAAGTGTTTGGGTGACT-3'   |
| <i>ELN</i>   | Forward       | 5'-GCAGGAGTTAAGCCCAAGG-3'    |
|              | Reverse       | 5'-TGTAGGGCAGTCCATAGCCA-3'   |
| <i>DCN</i>   | Forward       | 5'-TGGGCTGGCAGAGCATAAGT-3'   |
|              | Reverse       | 5'-CCAGGTGGGCAGAAGTCACT-3'   |
| <i>TGFBI</i> | Forward       | 5'-GAGCCTGAGGCCGACTACTA-3'   |
|              | Reverse       | 5'-GGGTTTCAGGTACCGCTTCTC-3'  |
| <i>CTGF</i>  | Forward       | 5'-CAAGGGCCTCTTCTGTGACT-3'   |
|              | Reverse       | 5'-ACGTGCACTGGTACTTGCAG-3'   |
| <i>MMP2</i>  | Forward       | 5'-TCTCCTGACATTGACCTTGGC-3'  |
|              | Reverse       | 5'-CAAGGTGCTGGCTGAGTAGATC-3' |
| <i>MMP9</i>  | Forward       | 5'-TTGACAGCGACAAGAAGTGG-3'   |
|              | Reverse       | 5'-GCCATTCACGTCGTCCTTAT-3'   |
| <i>TIMP1</i> | Forward       | 5'-CTGTTGTTGCTGTGGCTGATA-3'  |
|              | Reverse       | 5'-CCGTCCACAAGCAATGAGT-3'    |
| <i>LMNA</i>  | Forward       | 5'-GGACCTGCAGGAGCTCAATG-3'   |
|              | Reverse       | 5'-TCCTCACGCACTTTGCTCAG-3'   |
