# Supplementary material
Source: PubMed Central journal article supplement (PMC5234718)
Supplement: 10.1194_M071381_jlr.M071381-2.pdf [file 10.1194_M071381_jlr.M071381-2.pdf]

**Supplemental Table S2.** Sequences for RT-qPCR primer-pairs used for murine mRNAs.

| <b>Gene</b>  | <b>Primer</b> | <b>Sequence</b>               |
|--------------|---------------|-------------------------------|
| <i>Hprt</i>  | Forward       | 5'- TCAGTCAACGGGGGACATAAA-3'  |
|              | Reverse       | 5'- GGGGCTGTACTGCTTAACCAG-3'  |
| <i>Fnl</i>   | Forward       | 5'- CCGTGTAAGGGTCAAAGCAT-3'   |
|              | Reverse       | 5'- GCGACTCTGACTGGCCTTAC-3'   |
| <i>Dcn</i>   | Forward       | 5'- TGAGCTTCAACAGCATCACC-3'   |
|              | Reverse       | 5'- AAGTCATTTTGCCCAACTGC-3'   |
| <i>Tgfb1</i> | Forward       | 5'- CGTTACAGTGTTTCTGCCACCT-3' |
|              | Reverse       | 5'- AGACGAAGCACACTGGTCCAGC-3' |
| <i>Ctgf</i>  | Forward       | 5'- AAGTCATTTTGCCCAACTGC-3'   |
|              | Reverse       | 5'- GGCCAAATGTGTCTTCCAGT-3'   |
| <i>Mmp2</i>  | Forward       | 5'- AGGGCTGCATTGCAAATATC-3'   |
|              | Reverse       | 5'- CACACCAGGTGAAGGATGTG-3'   |
| <i>Mmp9</i>  | Forward       | 5'- GTGGATAGCTCGGTGGTGT-3'    |
|              | Reverse       | 5'- TGAATCAGCTGGCTTTTGTG-3'   |
| <i>Timp1</i> | Forward       | 5'- GCATCTGGCATCCTCTTGTT-3'   |
|              | Reverse       | 5'- TTCCATGACTGGGGTGTAGG-3'   |
| <i>Lmna</i>  | Forward       | 5'-GGACCTGCAGGAGCTCAATG-3'    |
|              | Reverse       | 5'-TCCTCACGCACTTTGCTCAG-3'    |
