# Supplementary material
Source: PubMed Central journal article supplement (PMC5234718)
Supplement: 10.1194_M071381_jlr.M071381-3.pdf [file 10.1194_M071381_jlr.M071381-3.pdf]

## Supplemental Figure

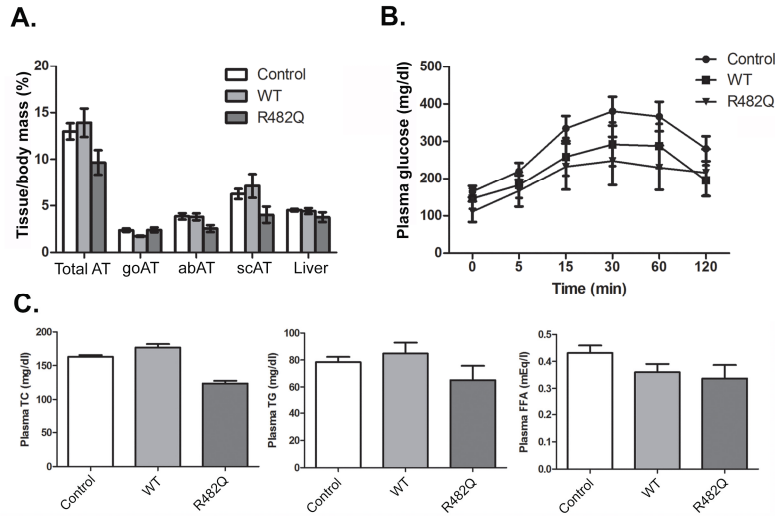

**Supplemental Fig S1.** Phenotypic characterization of male transgenic mice overexpressing FLAG-tagged human wild type or R482Q lamin A. (A) Bar graphs showing ratios of total adipose tissue (AT), gonadal depots (goAT), abdominal depots (abAT), subcutaneous depots (scAT) and liver masses to total body mass of and liver (lower panel) from non-transgenic control mice (Control), transgenic mice overexpressing FLAG-tagged human wild type human lamin A (WT) or FLAG-tagged human R482Q lamin A (R482Q) male mice at 40 weeks of age. Values are means  $\pm$  standard errors (Control n = 18; WT n = 7; R482Q n = 7). (B) Plasma glucose concentrations prior to (0 min) and immediately after administration of 1 mg/kg of glucose in Control (circle), WT (square) and R482Q (triangle) male mice at 39 weeks of age. Values are means  $\pm$  standard deviations (control n = 18; WT n = 7; R482Q n = 7). (C) Bar graphs showing concentrations of plasma total cholesterol (TC), triglyceride (TG) and free fatty acids (FFA) in Control, WT and R482Q male mice at 40 weeks of age. Values are means  $\pm$  standard errors (Control n = 14; WT n = 7; R482Q n = 7).
